# Supplementary material for: Predictor Packing in Developing Unprecedented Shaped Colloidal Particles<strong> </strong>
Source: Preprints.org preprint supplement (doi:10.20944/preprints201801.0039.v1), 2018-01-07
Supplement: Supplementary file 1 [file supplementary]

## **Supplementary Materials:**

### **Predictor packing in developing unprecedented shaped colloidal particles**

**Mubarak Ali <sup>a</sup>, I –Nan Lin <sup>b</sup> and C. –J. Yeh <sup>c</sup>**

<sup>a</sup> Department of Physics, COMSATS Institute of Information Technology, Islamabad 45550, Pakistan, Email: [mubarak74@comsats.edu.pk](mailto:mubarak74@comsats.edu.pk), [mubarak74@mail.com](mailto:mubarak74@mail.com)

<sup>b</sup> Department of Physics, Tamkang University, Tamsui Dist., New Taipei City 25137, Taiwan (R.O.C.). e-mail: [inanlin@mail.tku.edu.tw](mailto:inanlin@mail.tku.edu.tw)

<sup>c</sup> Department of Engineering and system Science, National Tsing-Hua University, Hsinchu 30013, Taiwan (R.O.C.). e-mail: [arayray220@gmail.com](mailto:arayray220@gmail.com)

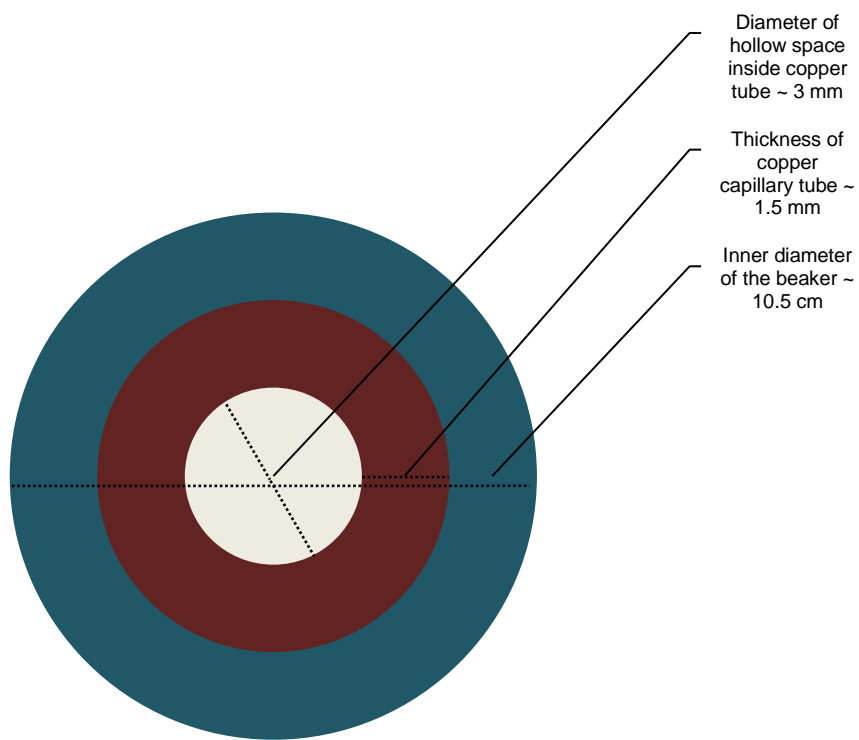

**Figure S1:** Inside diameter and thickness of copper capillary just placed over the surface of solution (~ 4 mm above) in glass beaker having inner diameter 10.5 cm.

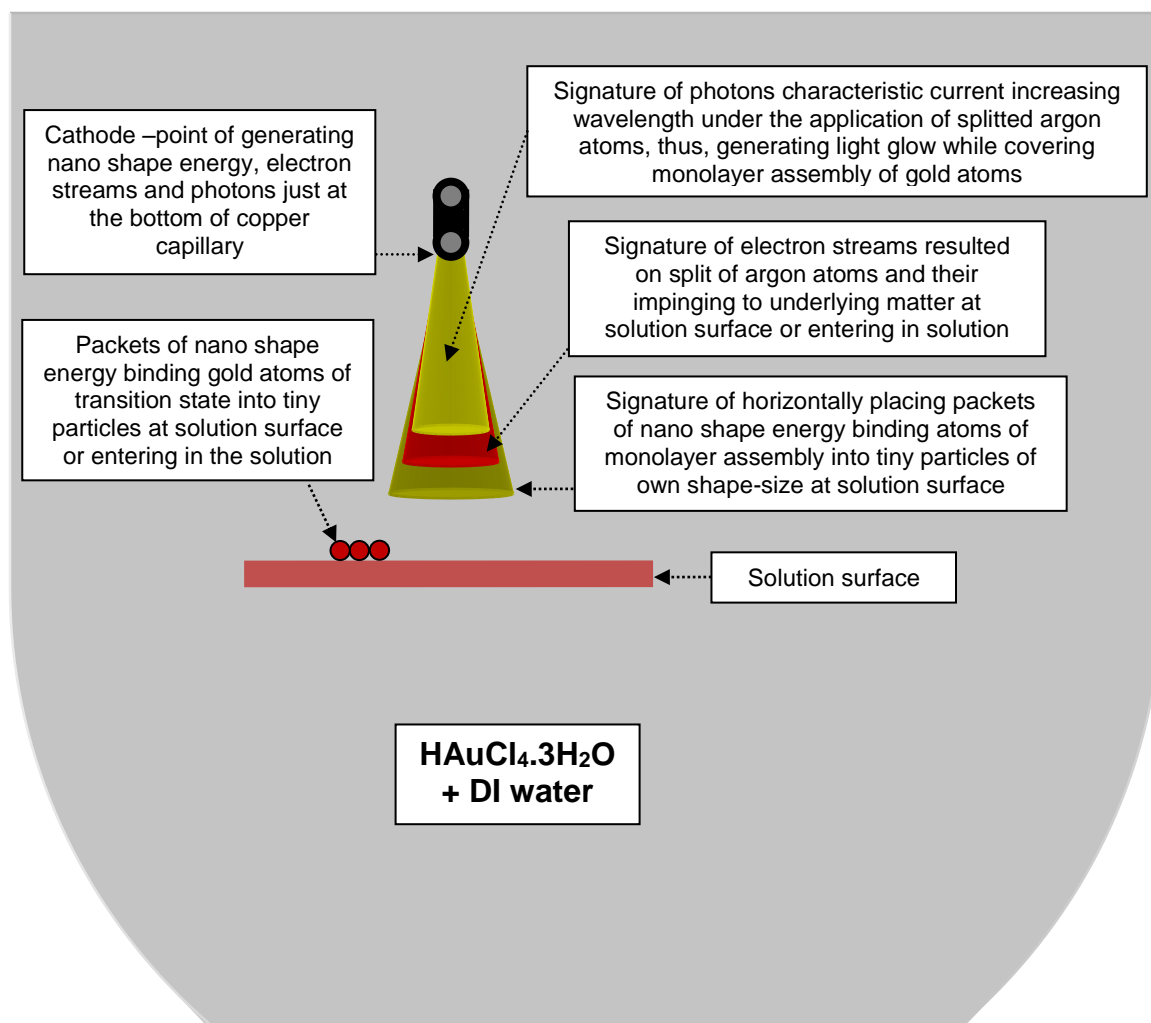

**Figure S2:** Signatures of nano shape energy, impinging electron streams and light glow including photons dealing monolayer assembly of gold atoms at solution surface

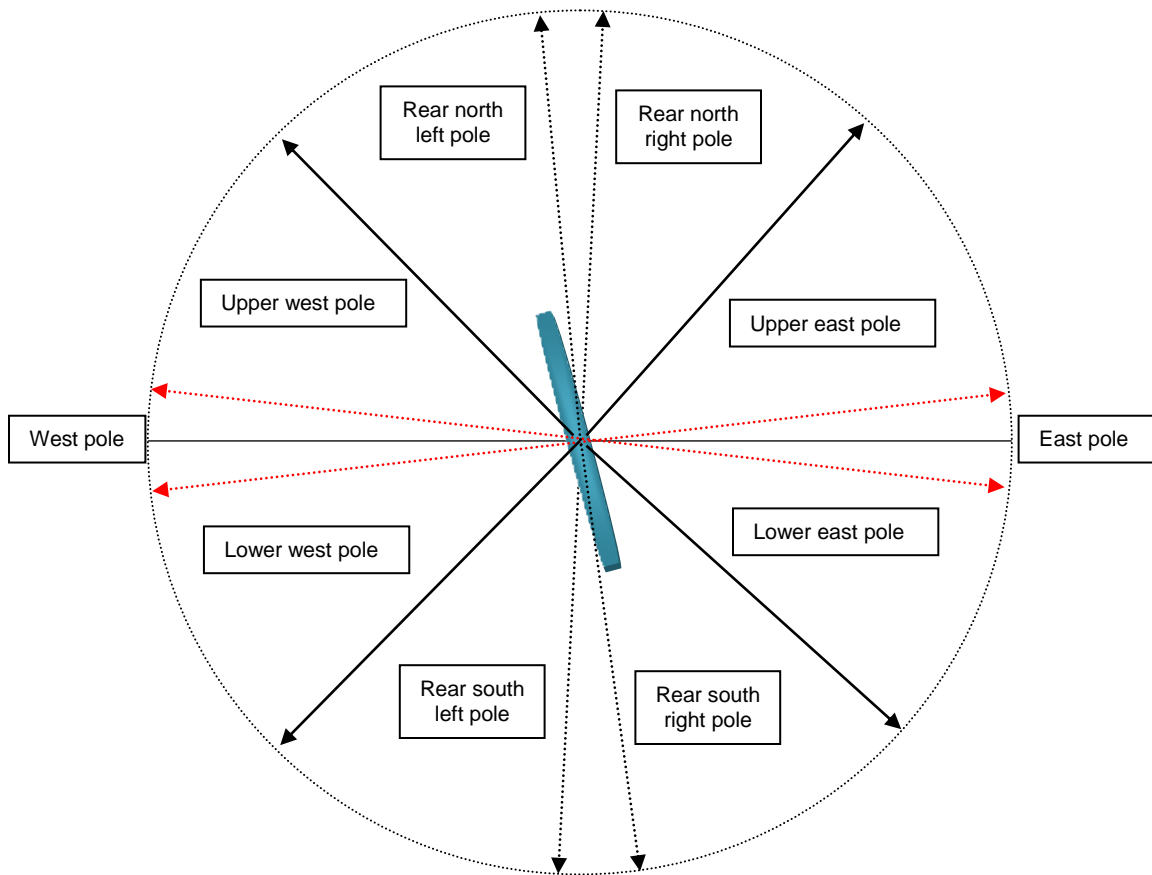

**Figure S3:** Approximate distribution of surface format axes with respect opposite poles along with zero-force axis where low degree angles packing of triangular-shaped tiny particles is along the rear north and south poles resulting into develop rod-/bar-shaped particles

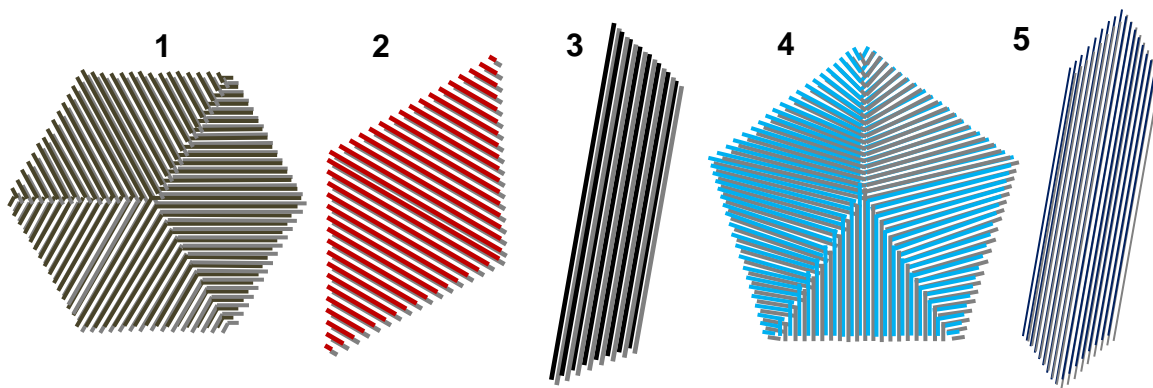

**Figure S4:** Different geometric anisotropic shaped particles developed under predictor packing of elongated triangular-shaped tiny particles having structure of smooth elements; (1) hexagonal-, (2) rhombus-, (3) bar-, (4) pentagonal-, (5) rod-shaped particles
